# Supplementary material for: TBX2 Expression predicts Tumor Recurrence and Adjuvant Chemotherapy Benefits in Gastric Cancer Patients following R0 Resection: a proposed approach for risk stratification
Source: PubMed Central journal article supplement (PMC7097955; doi:10.7150/jca.34929), 2020-03-04
Supplement: jcav11p3172s1.pdf [file jcav11p3172s1.pdf]

### Entire cohort

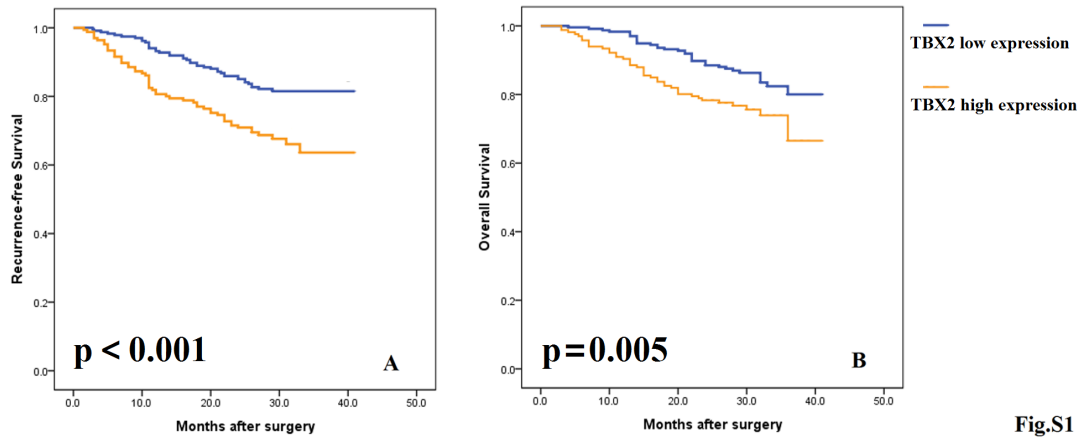

Fig.S1

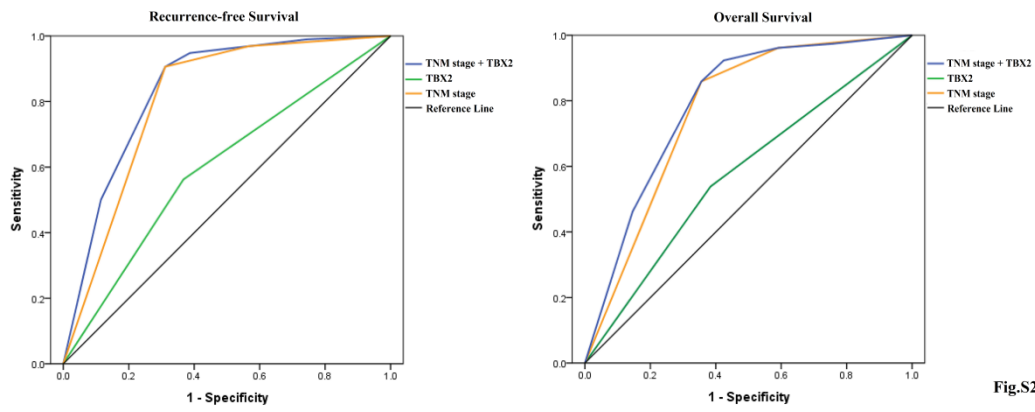

Fig.S2

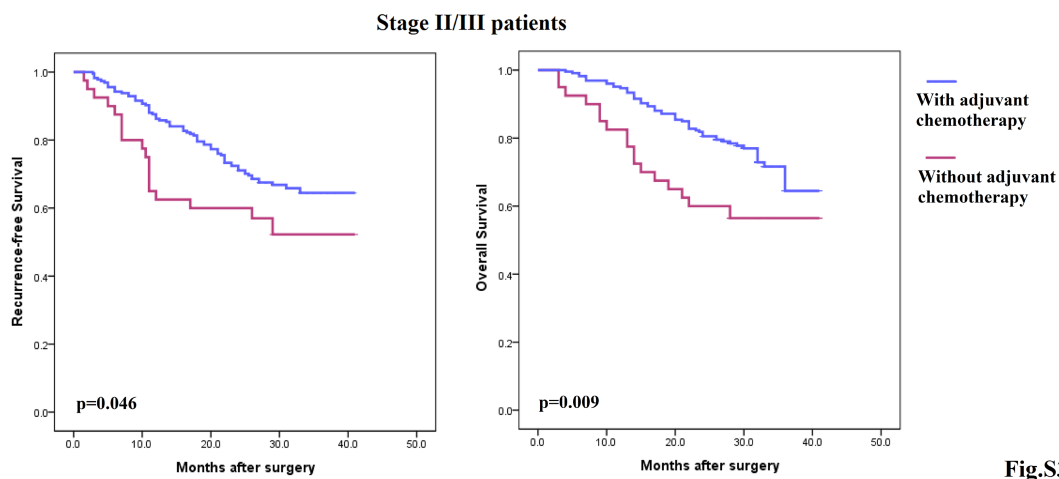

**Fig.S1** Kaplan–Meier analysis of recurrence-free (A) and overall (B) survival in patients with resected gastric cancer according to TBX2 expression.

**Fig.S2** Receiver operating characteristic (ROC) curves for different prognostic models.

**Fig.S3** Kaplan-Meier analysis of recurrence-free (A) and overall (B) survival in stage II/III patients according to whether received postsurgical adjuvant chemotherapy

**Table S1 Correlation Between TBX2 and Clinicopathologic Characteristics**

| Characteristics | TBX2 Expression (n, %) |            | p value |
|-----------------|------------------------|------------|---------|
|                 | High                   | Low        |         |
| All cases       | 235 (58.6)             | 166 (41.4) |         |
| Sex             |                        |            | 0.542   |
| Female          | 79 (33.6)              | 51 (30.7)  |         |
| Male            | 156 (66.4)             | 115 (69.3) |         |
| Age (y)         |                        |            | 0.191   |
| <65             | 166(70.6)              | 107(64.5)  |         |
| ≥65             | 69(29.4)               | 59(35.5)   |         |

|                         |            |            |       |
|-------------------------|------------|------------|-------|
| Tumor location          |            |            | 0.974 |
| Proximal                | 65 (27.7)  | 47(28.3)   |       |
| Middle                  | 40(17.0)   | 29(17.5)   |       |
| Distal                  | 107(45.5)  | 76(45.8)   |       |
| Entire                  | 23(9.8)    | 14(8.4)    |       |
| Tumor size (cm)         |            |            | 0.768 |
| <5                      | 138 (58.7) | 100(60.2)  |       |
| ≥5                      | 97(41.3)   | 66(39.8)   |       |
| Differentiation         |            |            | 0.411 |
| Differentiated          | 94(40.0)   | 74(44.6)   |       |
| Undifferentiated        | 141(60.0)  | 92(55.4)   |       |
| Lymphovascular invasion |            |            | 0.024 |
| Absent                  | 117(49.8)  | 101 (60.8) |       |
| Present                 | 118 (51.2) | 63(39.2)   |       |
| Tumor depth             |            |            | 0.183 |
| T1/2                    | 92 (39.3)  | 62(45.1)   |       |
| T3/4                    | 143(60.7)  | 104(54.9)  |       |
| Lymph node metastasis   |            |            | 0.044 |
| Absent                  | 85 (36.1)  | 60(41.7)   |       |
| Present                 | 150 (63.9) | 106(58.3)  |       |
| Pathological stage      |            |            | 0.117 |
| I                       | 79(33.6)   | 56(33.7)   |       |
| II                      | 38 (16.2)  | 40(24.7)   |       |
| III                     | 118(50.2)  | 69(41.6)   |       |
| Adjuvant chemotherapy   |            |            | 0.207 |
| Absent                  | 79(33.6)   | 66(39.8)   |       |
| Present                 | 156(66.4)  | 100(60.2)  |       |

---

**Table S2. Univariate and Multivariable Analysis of Recurrence-free Survival**

| Variables                                | Univariate   |              |          | Multivariable |             |          |
|------------------------------------------|--------------|--------------|----------|---------------|-------------|----------|
|                                          | Hazard Ratio | 95% CI       | p value  | Hazard Ratio  | 95% CI      | p value  |
| Sex (male)                               | 1.246        | 0.779-1.945  | 0.332    |               |             |          |
| Age ( $\geq 65$ )                        | 1.182        | 0.776-1.801  | 0.436    |               |             |          |
| Tumor location (lower third)             | 0.807        | 0.655-0.994  | 0.044    | 0.961         | 0.783-1.178 | 0.700    |
| Tumor size ( $\geq 5$ cm)                | 3.792        | 2.480-5.800  | $<0.001$ | 1.409         | 0.902-2.201 | 0.132    |
| Tumor differentiation (undifferentiated) | 2.130        | 1.357-3.341  | 0.001    | 1.289         | 0.854-1.579 | 0.897    |
| Lymphovascular involvement               | 6.354        | 3.877-10.416 | $<0.001$ | 2.259         | 1.349-3.785 | 0.002    |
| Pathological stage (stage III vs I/II)   | 6.547        | 3.910-10.964 | $<0.001$ | 5.310         | 3.052-9.236 | $<0.001$ |
| Adjuvant chemotherapy                    | 0.435        | 0.266-0.712  | 0.001    | 0.509         | 0.304-0.853 | 0.010    |
| TBX2 expression (high)                   | 2.075        | 1.386-3.106  | $<0.001$ | 1.930         | 1.284-2.900 | 0.002    |

**Table S3. Univariate and Multivariable Analysis of Overall Survival**

| Variables                                | Univariate   |             |          | Multivariable |             |         |
|------------------------------------------|--------------|-------------|----------|---------------|-------------|---------|
|                                          | Hazard Ratio | 95% CI      | p value  | Hazard Ratio  | 95% CI      | p value |
| Sex (male)                               | 1.053        | 0.065-1.704 | 0.832    |               |             |         |
| Age ( $\geq 65$ )                        | 1.396        | 0.884-2.203 | 0.152    |               |             |         |
| Tumor location (lower third)             | 0.924        | 0.738-1.156 | 0.488    |               |             |         |
| Tumor size ( $\geq 5$ cm)                | 3.581        | 2.236-5.736 | $<0.001$ | 1.152         | 0.941-2.560 | 0.085   |
| Tumor differentiation (undifferentiated) | 2.115        | 1.282-3.489 | 0.003    | 1.081         | 0.643-1.820 | 0.768   |
| Lymphatic involvement                    | 4.438        | 2.774-7.100 | $<0.001$ | 2.286         | 1.270-4.114 | 0.006   |

|                                  |       |              |        |       |             |        |
|----------------------------------|-------|--------------|--------|-------|-------------|--------|
| Pathological stage (III vs I/II) | 6.368 | 3.624-11.189 | <0.001 | 3.399 | 1.989-5.808 | <0.001 |
| Adjuvant chemotherapy            | 0.518 | 0.306-878    | 0.014  | 0.520 | 0.297-0.911 | 0.022  |
| TBX2 expression (high)           | 1.862 | 1.193-2.908  | 0.006  | 1.633 | 1.041-2.560 | 0.033  |

---
